# Supplementary material
Source: PubMed Central journal article supplement (PMC4076954)
Supplement: NIHMS541238-supplement-supplement_1.pdf [file NIHMS541238-supplement-supplement_1.pdf]

## **SUPPLEMENTAL MATERIAL**

**Supplemental Table 1.** Propensity Model Results for Discharge Anticoagulation

**Supplemental Table 2.** Inverse Probability-Weighted Characteristics of the Study Population

**Supplemental Table 1. Propensity Model Results for Discharge Anticoagulation**

| Variable                              | Odds Ratio<br>(95% CI) | P Value |
|---------------------------------------|------------------------|---------|
| Age, per 5 years                      | 0.83 (0.77,0.90)       | < .001  |
| Sex                                   |                        |         |
| Female                                | [Reference]            |         |
| Male                                  | 0.85 (0.68-1.06)       | .14     |
| Race                                  |                        |         |
| Black                                 | 0.73 (0.49-1.08)       | .12     |
| White                                 | [Reference]            |         |
| Other/unknown                         | 0.74 (0.48-1.15)       | .18     |
| Comorbid conditions                   |                        |         |
| Chronic obstructive pulmonary disease | 0.88 (0.71-1.10)       | .26     |
| Chronic renal insufficiency           | 0.88 (0.69-1.13)       | .32     |
| Coronary artery disease               | 0.95 (0.74-1.22)       | .71     |
| Diabetes mellitus                     | 0.84 (0.68-1.05)       | .12     |
| Dyspnea                               | 1.01 (0.74-1.38)       | .96     |
| Fatigue                               | 1.05 (0.85-1.30)       | .65     |
| Hyperlipidemia/dyslipidemia           | 0.95 (0.77-1.17)       | .62     |
| Hypertension                          | 0.88 (0.70-1.10)       | .25     |
| Peripheral vascular disease           | 0.86 (0.66-1.13)       | .28     |
| Prior myocardial infarction           | 0.83 (0.66-1.04)       | .10     |
| Rales                                 | 0.67 (0.55-0.83)       | < .001  |
| Stroke or transient ischemic attack   | 0.88 (0.67-1.15)       | .36     |
| Ejection fraction                     |                        |         |
| > 40%                                 | 0.79 (0.60-1.05)       | .10     |
| 26% to 35%                            | [Reference]            |         |
| ≤ 25%                                 | 1.04 (0.80-1.35)       | .77     |
| Missing                               | 0.56 (0.40-0.80)       | .002    |
| Heart rate                            |                        |         |
| < 80 bpm                              | 0.90 (0.72-1.13)       | .37     |
| 80-100 bpm                            | [Reference]            |         |
| > 100 bpm                             | 1.50 (1.11-2.03)       | .008    |
| Systolic blood pressure               |                        |         |

| Variable                      | Odds Ratio<br>(95% CI) | P Value |
|-------------------------------|------------------------|---------|
| < 110 mm Hg                   | 0.99 (0.75-1.29)       | .92     |
| 110-150 mm Hg                 | [Reference]            |         |
| > 150 mm Hg                   | 0.99 (0.77-1.27)       | .94     |
| Serum creatinine              |                        |         |
| < 1.5 mg/dL                   | [Reference]            |         |
| 1.5-2.0 mg/dL                 | 0.86 (0.67-1.10)       | .24     |
| > 2.0 mg/dL                   | 1.14 (0.83-1.55)       | .42     |
| Serum sodium                  |                        |         |
| < 135 mEq/L                   | 1.22 (0.95-1.57)       | .11     |
| 135-145 mEq/L                 | [Reference]            |         |
| > 145 mEq/L                   | 1.09 (0.57-2.07)       | .79     |
| Hemoglobin                    |                        |         |
| < 9 g/dL                      | 0.89 (0.52-1.54)       | .68     |
| 9-11 g/dL                     | 0.78 (0.60-1.00)       | .05     |
| > 11 g/dL                     | [Reference]            |         |
| Length of index stay > 7 days | 2.25 (1.77-2.85)       | < .001  |
| Model c statistic             | 0.668                  |         |

**Supplemental Table 2. Inverse Probability-Weighted Characteristics of the Study Population**

| Characteristic              | No Anticoagulation<br>(n = 2049) | Anticoagulation<br>(n = 537) | Standardized<br>Difference, % | P Value |
|-----------------------------|----------------------------------|------------------------------|-------------------------------|---------|
| Age, mean (SD), y           | 79.6 (7.4)                       | 79.5 (6.9)                   | 1.2                           | .81     |
| Male, No. (%)               | 1100 (53.9)                      | 295 (53.7)                   | 0.3                           | .95     |
| Race, No. (%)               |                                  |                              | 2.2                           | .91     |
| Black                       | 168 (7.9)                        | 36 (7.7)                     |                               |         |
| White                       | 1754 (86.2)                      | 473 (86.9)                   |                               |         |
| Other/unknown               | 127 (5.9)                        | 28 (5.5)                     |                               |         |
| Medical history, No. (%)    |                                  |                              |                               |         |
| Coronary artery disease     | 1526 (74.3)                      | 392 (75.0)                   | 1.6                           | .74     |
| Prior myocardial infarction | 816 (39.1)                       | 193 (40.5)                   | 2.9                           | .55     |
| Diabetes mellitus           | 785 (37.8)                       | 192 (37.2)                   | 1.1                           | .82     |
| Chronic renal insufficiency | 756 (36.4)                       | 185 (36.8)                   | 0.9                           | .86     |

| Characteristic                        | No Anticoagulation<br>(n = 2049) | Anticoagulation<br>(n = 537) | Standardized<br>Difference, % | P Value |
|---------------------------------------|----------------------------------|------------------------------|-------------------------------|---------|
| Hyperlipidemia/dyslipidemia           | 881 (42.8)                       | 227 (41.9)                   | 1.9                           | .70     |
| Hypertension                          | 1465 (70.4)                      | 356 (69.6)                   | 1.7                           | .73     |
| Peripheral vascular disease           | 391 (18.6)                       | 88 (19.3)                    | 1.7                           | .72     |
| Stroke or transient ischemic attack   | 385 (18.1)                       | 83 (17.6)                    | 1.3                           | .79     |
| Chronic obstructive pulmonary disease | 656 (31.7)                       | 164 (31.8)                   | 0.1                           | .98     |
| Initial evaluation, No. (%)           |                                  |                              |                               |         |
| Dyspnea                               | 1827 (88.8)                      | 471 (88.3)                   | 1.7                           | .73     |
| Ejection fraction                     |                                  |                              | 2.4                           | .97     |
| Normal or slightly impaired (> 40%)   | 622 (29.4)                       | 140 (28.8)                   |                               |         |
| Moderately impaired (26%-40%)         | 481 (24.1)                       | 140 (23.9)                   |                               |         |
| Severely impaired (≤ 25%)             | 598 (31.0)                       | 202 (32.1)                   |                               |         |
| Missing                               | 348 (15.6)                       | 55 (15.2)                    |                               |         |
| Fatigue                               | 654 (32.3)                       | 180 (32.4)                   | 0.4                           | .94     |
| Pulmonary edema                       | 1708 (82.4)                      | 420 (82.6)                   | 0.4                           | .93     |
| Rales                                 | 1375 (65.3)                      | 312 (65.6)                   | 0.7                           | .89     |
| Initial vital signs, No. (%)          |                                  |                              |                               |         |
| Pulse                                 |                                  |                              | 2.3                           | .90     |
| < 80 bpm                              | 1165 (55.3)                      | 266 (54.7)                   |                               |         |
| 80-100 bpm                            | 644 (31.6)                       | 174 (31.5)                   |                               |         |
| > 100 bpm                             | 240 (13.1)                       | 97 (13.9)                    |                               |         |
| Systolic blood pressure               |                                  |                              | 3.0                           | .83     |
| < 110 mm Hg                           | 355 (18.1)                       | 113 (17.9)                   |                               |         |
| 110-150 mm Hg                         | 1122 (54.8)                      | 293 (56.1)                   |                               |         |
| > 150 mm Hg                           | 572 (27.2)                       | 131 (25.9)                   |                               |         |
| Laboratory test results               |                                  |                              |                               |         |
| Serum creatinine                      |                                  |                              | 4.2                           | .69     |
| < 1.5 mg/dL                           | 1031 (50.8)                      | 282 (51.2)                   |                               |         |
| 1.5-2.0 mg/dL                         | 617 (29.4)                       | 146 (27.8)                   |                               |         |
| > 2.0 mg/dL                           | 401 (19.7)                       | 109 (21.0)                   |                               |         |
| Serum sodium                          |                                  |                              | 3.7                           | .75     |
| < 135 mEq/L                           | 369 (18.9)                       | 118 (20.2)                   |                               |         |
| 135-145 mEq/L                         | 1631 (78.8)                      | 406 (77.7)                   |                               |         |

| Characteristic                   | No Anticoagulation<br>(n = 2049) | Anticoagulation<br>(n = 537) | Standardized<br>Difference, % | P Value |
|----------------------------------|----------------------------------|------------------------------|-------------------------------|---------|
| > 145 mEq/L                      | 49 (2.4)                         | 13 (2.1)                     |                               |         |
| Hemoglobin                       |                                  |                              | 1.3                           | .96     |
| < 9 g/dL                         | 74 (3.6)                         | 18 (3.3)                     |                               |         |
| 9-11 g/dL                        | 489 (22.9)                       | 102 (23.1)                   |                               |         |
| > 11 g/dL                        | 1486 (73.5)                      | 417 (73.6)                   |                               |         |
| Discharge medications, No. (%)   |                                  |                              |                               |         |
| ACE inhibitor or ARB             | 1247 (60.7)                      | 349 (65.0)                   | 8.8                           | .07     |
| Aspirin                          | 1215 (59.2)                      | 216 (40.3)                   | 38.6                          | < .001  |
| $\beta$ -Blocker                 | 1336 (65.3)                      | 361 (68.1)                   | 5.9                           | .23     |
| Clopidogrel                      | 449 (21.6)                       | 37 (6.8)                     | 43.2                          | < .001  |
| Diuretic                         | 1610 (78.3)                      | 420 (78.7)                   | 1.0                           | .83     |
| Lipid-lowering agent             | 741 (36.0)                       | 213 (39.9)                   | 8.0                           | .10     |
| Length of stay, mean (SD), d     | 5.0 (3.9)                        | 5.4 (3.9)                    | 9.3                           | .06     |
| Length of stay > 7 days, No. (%) | 295 (17.4)                       | 153 (17.6)                   | 0.4                           | .93     |

Abbreviations: ACE, angiotensin-converting enzyme; ARB, angiotensin-receptor blocker.
